# Supplementary material
Source: PubMed Central journal article supplement (PMC3689251)

Supplemental Table:

| Gene             | Forward : 5'-3'               | Reverse: 5'-3'                     |
|------------------|-------------------------------|------------------------------------|
| LRP5             | GGAGTCAAGCTGGAGTCCACC         | CGTCTGGTTCAGGTAGGTCTGC             |
| LRP6             | GGACTTGCATTGGTTGATGCTAC       | CAACAACATTCTGCACACTCTCAG           |
| Ror1             | CCTGACCCTCGATGAACCAATG        | GCAGCCGAGAGCCATAGATG               |
| Ror2             | CTGCCAAGTGTGAGGCGCTGCC        | GCTCAGGGAAGTCTGTGCTGGAC            |
| RYK              | CCTGAGCGAGGACGAGGTG           | CGCATGCCAGGTGAAGTGC                |
| Wnt1             | CAAGATCGTCAACCGAGGCTG         | GAAGTCAATGTTGTCGCTGCAG             |
| Wnt2             | CGAGGTCAACTCTTCATGGTGGTAC     | CTGGCTAATGGCACGCATCAC              |
| Wnt3             | GACCTGGTCTACTACGAGAATC        | GAGCAGATCGCAGCCATCGATG             |
| Wnt3a            | GCATCAAGATTGGCATCCAGGAGTG     | CTGCACATGAGCGTGTCACTG              |
| Wnt4             | GGAGGAGACGTGCCGAGAAAC         | CAGGTTCCGCTTGACATCT                |
| Wnt5a            | CACATGCAGTACATCGGAGAAG        | CTGCTGCGCTCACCGCGTATG              |
| Wnt5b            | GAAGCTGTGCCAATTGTACCAG        | GCTGCCTATCTGCATGACTCTCC            |
| Wnt7a            | GACGCCATCATCGTCATAGGA         | GGCCATTGCCGGAAGTAA                 |
| Wnt7b            | GAAGCTCGGAGCACTGTCA           | GGCCAGGAATCTTGTGCA                 |
| Wnt8a            | GCTTGGGAACGCTGGAAGTGC         | CATTGTTGACCCATCACAGCCAC            |
| Wnt8b            | CAGTGCCAATCGGGAGACAGC         | GACAAACTGCTTGGAAATCGCC             |
| Wnt9a            | CATGGAGCGCTGTACCTGCGATG       | GTCCACACGGGCTCGCAGATG              |
| Wnt10a           | CACAGTGTGCCTAACATTGCCAG       | CTGCTGAAGATGGGACTCTCATAG           |
| Wnt10b           | CATCCTCAAGCGCGTTTCCG          | CTCAGCCGATCCTGCTCACCAC             |
| Wnt16b           | CTGCTCGTGTGTTCCCTAC           | GATCATGCAGTTCATCTCTCG              |
| DKK-1            | GATCATAGCACCTTGGATGGGTATTC    | CAATCCTGAGGCACAGTCTGATGAC          |
| TCF-1            | CGACCTGGCCGAGCTCAAGTCG        | GTCCGGGAAGAGTCTCTGCGCAG            |
| TCF-4            | CCTCGGCAGAGAGGGATTTAGCTG      | GAGCCCTCCATCTTGCCTCTTG             |
| LEF-1            | GATGCCCAACTCTCCGAGGAG         | CCTCTTCGGGATGACTGATCT              |
| $\beta$ -catenin | GAGACATTAGATGAGGGCATGCAG      | GTTTACAACATGCATGTTTCAGCATCTC       |
| c-myc            | CGTCTCCACACATCAGCACAA         | TCTTGGCAGCAGGATAGTCCCTT            |
| Survivin         | GGAGCTGGAAGGCTGGGA            | AGCGCAACCGGACGAA                   |
| VEGF             | TCTACCTCCACCATGCCAAGT         | GATGATTCTGCCCTCCTCCTT              |
| c-jun            | TGGAAACGACCTTCTATGACGAT       | TGTAGCCATAAGGTCCGCTCTC             |
| Cox-2            | GTTGAATCATTACCAGGCAAA         | TCTGTACTGCGGTGGAACA                |
| Cyclin D1        | GCATGTTGTTGGCCTTAAGAT         | TCGGTGTAGATGCACAGCTTCT             |
| GAPDH            | GAAGGTGAAGGTCCGAGTC           | GAAGATGGTGTGTTGTTTC                |
| OPG<br>(Mouse)   | CAGGTGAGACTTCATCGAAAGCAC      | CTGAAGAAGGCCTTTCACACAG             |
| RANKL<br>(Mouse) | CGCAGATTTGCAGGACTCGACTC       | GAGCTCCTGAGAAGCGCTGTGG             |
| RANK<br>(Mouse)  | CTACCACTGGAAGTCAAGTCCGAG      | CAGACCACATCTGATTCCGTTGTC           |
| EBF2<br>(Mouse)  | CAATGAGAAGACCAACAATGGTACTC    | GCTCTTCTTCTCACAGCATCGACTG          |
| GAPDH<br>(Mouse) | CCTCAAAAGAGCTGTGTCTGAAC       | GACACCTCCGAGGTAGCTCTG              |
| DKK1pTRIPZ       | GGACCGGTATGATGGCTCTGGGCGCAGCG | CCGAATTCTTAGTGTCTCTGACAAGTGTGAAGCC |

Supplemental Figure

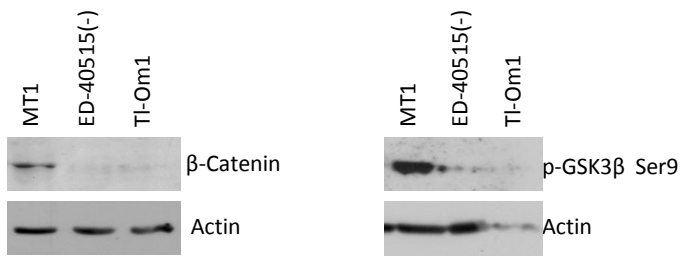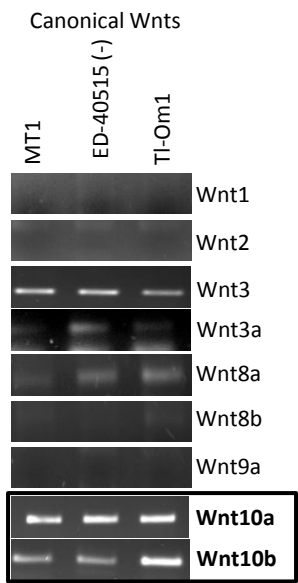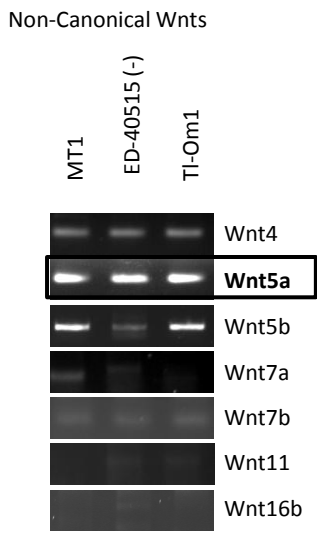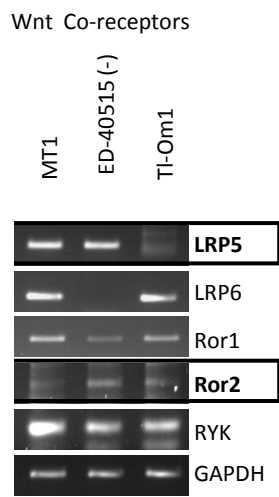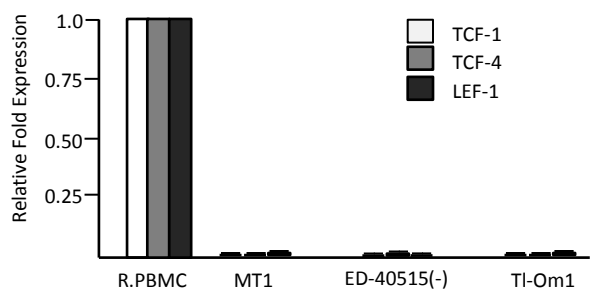

Supplement: supp_blood-2012-07-439109_blood-2012-07-439109-1.pdf [file supp_blood-2012-07-439109_blood-2012-07-439109-1.pdf]
